# Supplementary material for: Overexpression of Pdx1, reduction of p53, or deletion of CHOP attenuates pancreas hypoplasia in mice with pancreas-specific O-GlcNAc transferase deletion
Source: PubMed Central journal article supplement — J Biol Chem. 2023 Jan 6;299(2):102878. doi: 10.1016/j.jbc.2023.102878 (PMC9932656; doi:10.1016/j.jbc.2023.102878), 2023-01-06
Supplement: mmc1.pdf [file mmc1.pdf]

# Supplemental Figure 1

A

| Category      | Term                                                                               | FDR         |
|---------------|------------------------------------------------------------------------------------|-------------|
| GOTERM_BP_FAT | GO:0031325~positive regulation of cellular metabolic process                       | 3.94594E-23 |
| GOTERM_BP_FAT | GO:0010604~positive regulation of macromolecule metabolic process                  | 1.51999E-22 |
| GOTERM_BP_FAT | GO:0031328~positive regulation of cellular biosynthetic process                    | 3.34591E-22 |
| GOTERM_BP_FAT | GO:0009893~positive regulation of metabolic process                                | 4.46584E-22 |
| GOTERM_BP_FAT | GO:0009891~positive regulation of biosynthetic process                             | 4.88375E-22 |
| GOTERM_BP_FAT | GO:0045935~positive regulation of nucleobase-containing compound metabolic process | 7.84942E-22 |
| GOTERM_BP_FAT | GO:0051173~positive regulation of nitrogen compound metabolic process              | 1.18526E-21 |
| GOTERM_BP_FAT | GO:0010628~positive regulation of gene expression                                  | 1.39136E-20 |
| GOTERM_BP_FAT | GO:0010557~positive regulation of macromolecule biosynthetic process               | 2.37441E-20 |
| GOTERM_BP_FAT | GO:0010033~response to organic substance                                           | 2.96498E-20 |
| GOTERM_BP_FAT | GO:0051254~positive regulation of RNA metabolic process                            | 9.21353E-20 |
| GOTERM_BP_FAT | GO:0048584~positive regulation of response to stimulus                             | 9.21353E-20 |
| GOTERM_BP_FAT | GO:1903508~positive regulation of nucleic acid-templated transcription             | 1.58486E-19 |
| GOTERM_BP_FAT | GO:0045893~positive regulation of transcription, DNA-templated                     | 1.58486E-19 |
| GOTERM_BP_FAT | GO:1902680~positive regulation of RNA biosynthetic process                         | 1.7684E-19  |
| GOTERM_BP_FAT | GO:0042981~regulation of apoptotic process                                         | 2.87053E-19 |
| GOTERM_BP_FAT | GO:0006915~apoptotic process                                                       | 3.61243E-19 |
| GOTERM_BP_FAT | GO:0043067~regulation of programmed cell death                                     | 4.0531E-19  |
| GOTERM_BP_FAT | GO:0009719~response to endogenous stimulus                                         | 5.0699E-19  |
| GOTERM_BP_FAT | GO:0010941~regulation of cell death                                                | 8.23807E-19 |
| GOTERM_BP_FAT | GO:0042592~homeostatic process                                                     | 1.26782E-18 |
| GOTERM_BP_FAT | GO:0023051~regulation of signaling                                                 | 1.48005E-18 |
| GOTERM_BP_FAT | GO:0060548~negative regulation of cell death                                       | 2.12189E-18 |
| GOTERM_BP_FAT | GO:0012501~programmed cell death                                                   | 2.14558E-18 |
| GOTERM_BP_FAT | GO:0008219~cell death                                                              | 3.47412E-18 |
| GOTERM_BP_FAT | GO:0006351~transcription, DNA-templated                                            | 3.50047E-18 |
| GOTERM_BP_FAT | GO:0010646~regulation of cell communication                                        | 9.64296E-18 |
| GOTERM_BP_FAT | GO:0009966~regulation of signal transduction                                       | 1.00801E-17 |
| GOTERM_BP_FAT | GO:1901700~response to oxygen-containing compound                                  | 1.00801E-17 |
| GOTERM_BP_FAT | GO:0019220~regulation of phosphate metabolic process                               | 2.68315E-17 |
