# Supplementary figures and images for: Overexpression of Pdx1, reduction of p53, or deletion of CHOP attenuates pancreas hypoplasia in mice with pancreas-specific O-GlcNAc transferase deletion
Source: PubMed Central journal article supplement — J Biol Chem. 2023 Jan 6;299(2):102878. doi: 10.1016/j.jbc.2023.102878 (PMC9932656; doi:10.1016/j.jbc.2023.102878), 2023-01-06

# Supplemental Figure 2

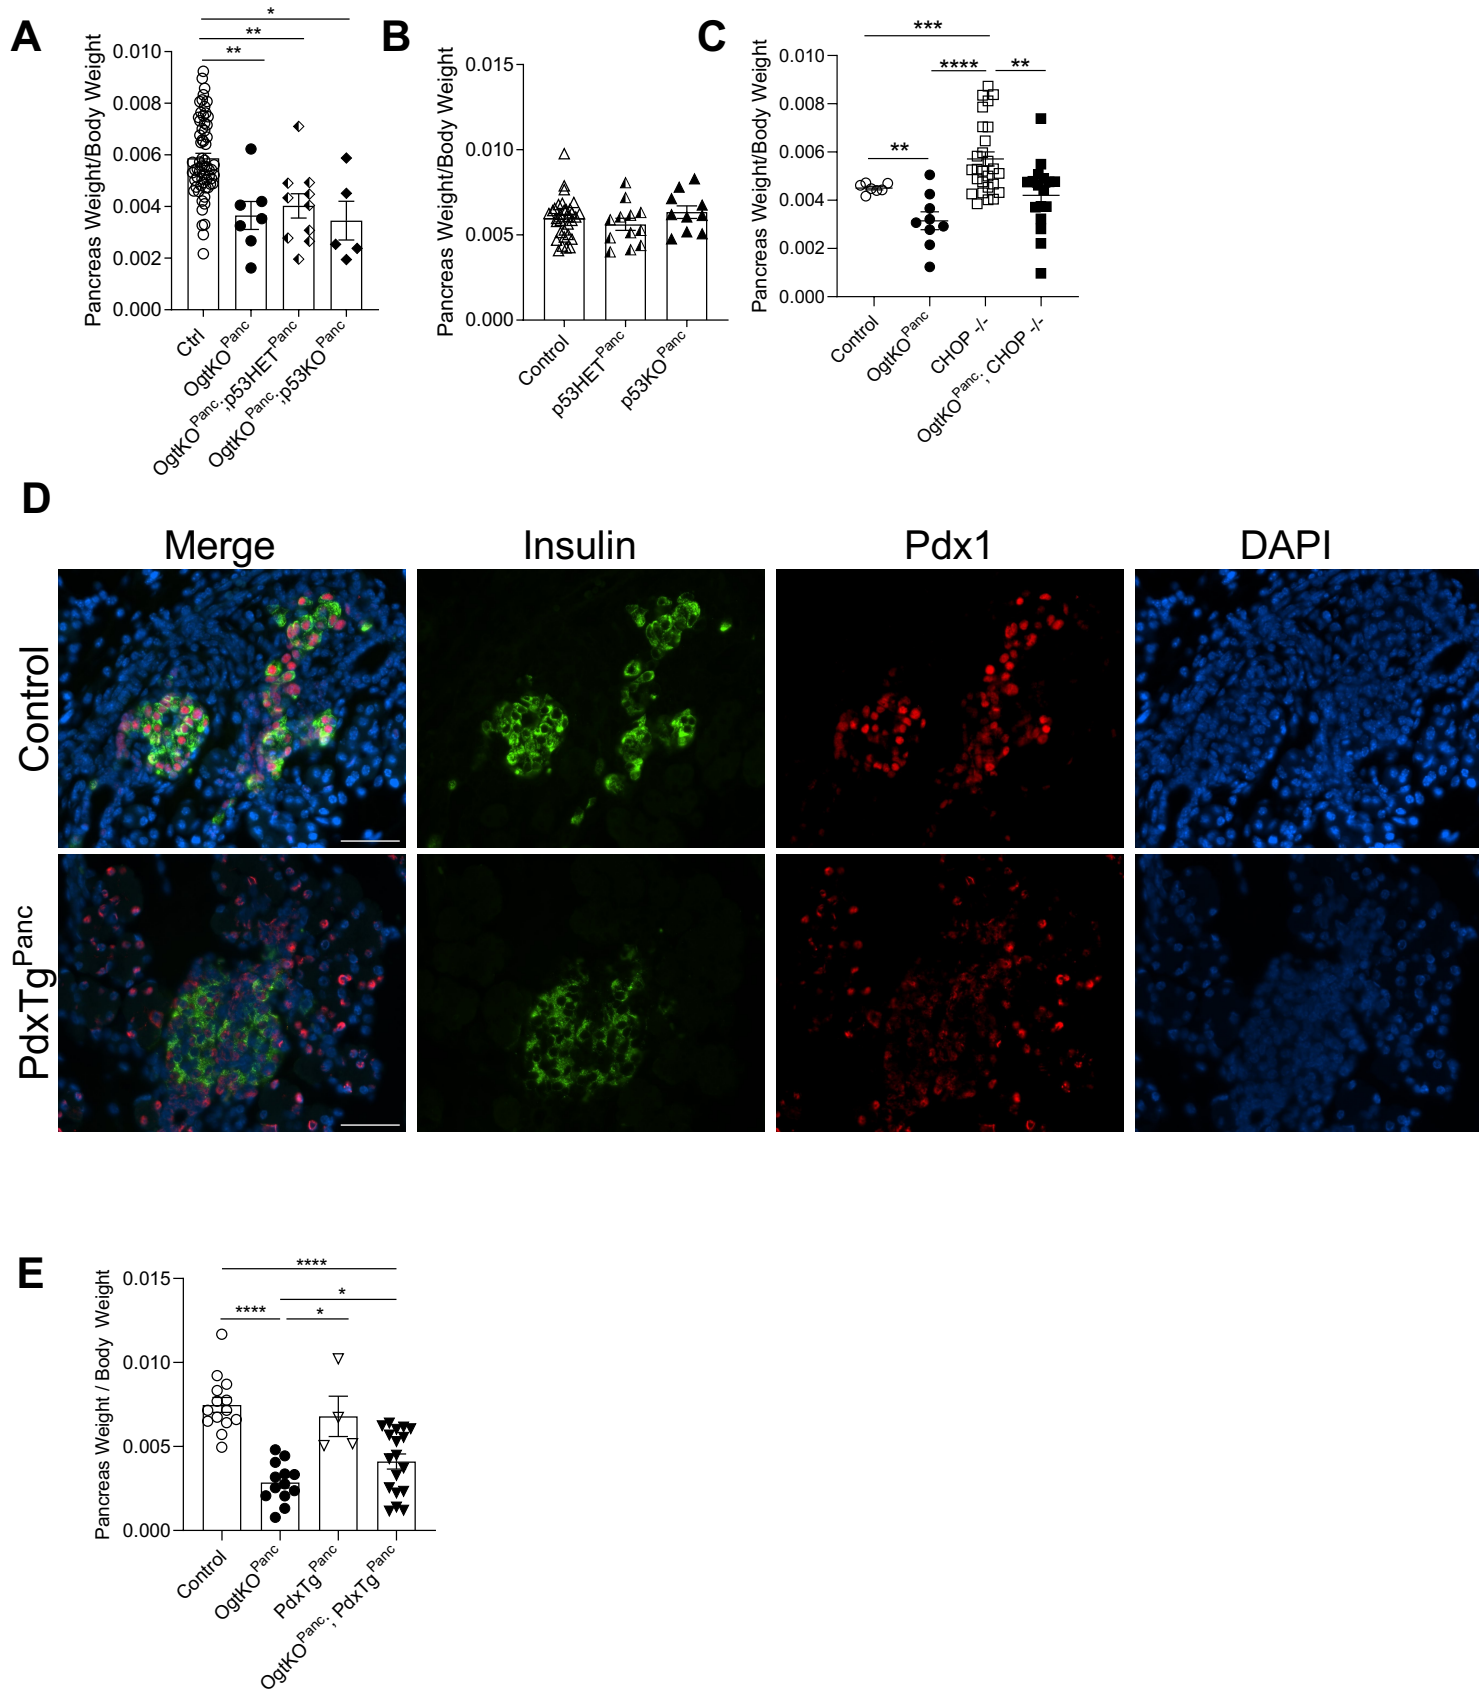

Supplement: mmc2.pdf [file mmc2.pdf]
